# Supplementary material
Source: HighWire-hosted journal article supplement (https://bmjopen.bmj.com/content/11/7/e047832)
Supplement: inline-supplementary-material-1 [file inline-supplementary-material-1.pdf]

**Supplementary appendix for the study**

Lessons from countries implementing find, test, trace, isolation and support policies in the rapid response of the COVID-19 pandemic: a systematic review

**Supplementary section one: Search strategy**

Example database: MEDLINE (PubMed)

We applied search terms "contact tracing" or "testing" or "self-isolation" or "quarantine" in the title in combination with "Covid-19" or "COVID-19" or "coronavirus" in the title or text. The studies were published between May 31st 2019 and May 31st 2020.

MEDLINE (PubMed) search: "contact"[Title] OR "contact tracing"[Title] OR "testing"[Title] OR "isolation"[Title] OR "quarantine"[Title] OR "self-isolation"[Title]) AND ("Covid-19"[Title/Abstract] OR "COVID-19"[Title/Abstract] OR "coronavirus"[Title/Abstract])

Filters applied: Clinical Study, Clinical Trial, Controlled Clinical Trial, Evaluation Study, Government Document, Journal Article, Meta-Analysis, Multicenter Study, Observational Study, Practice Guideline, Pragmatic Clinical Trial, Randomized Controlled Trial, Review, Systematic Reviews, Technical Report, in the last 1 year, Humans, English, MEDLINE.

We applied the same search strategy for Cochrane Library, SCOPUS and JSTOR.

**Supplementary section two: supplementary search strategy for the second review between June 2020 and January 2021**

We applied search terms "contact tracing" or "testing" or "self-isolation" or "quarantine" in the title in combination with "Covid-19" or "COVID-19" or "coronavirus" in the title. The studies were published between June 1st 2020 and January 21st 2021.

Example database: MEDLINE (PubMed)

("contact tracing"[Title] OR "testing"[Title] OR "self-isolation"[Title]) AND ("Covid-19"[Title] OR "COVID-19"[Title]) Filters: Clinical Trial, Controlled Clinical Trial, Evaluation Study, Government Publication, Journal Article, Meta-Analysis, Observational Study, Practice Guideline, Pragmatic Clinical Trial, Randomized Controlled Trial, Review, Systematic Review, Technical Report, Humans, English, MEDLINE, from 2020/6/1 - 2021/1/21

Result in 392 studies

Exclude 73 studies have citations not yet completed MEDLINE indexing.

Result in 319 studies

Other exclusion criteria:

Items that were not directly focused on COVID-19 or strategy of testing, contact tracing or isolation in the general population, or not in the format of a research report, and studies with very small sample size  $\leq 5$

After title screening: remove 180, 139 remains

After abstract screening: remove 49, 95 remains

We applied the same search strategy for Cochrane Library, SCOPUS and JSTOR.

The total studies after abstract screening: 148

The total studies after text screening: 58

Table S1: Baseline table for reviewed studies.

| Authors             | Published year | Study type             | Study aim(s)                                                                                               |
|---------------------|----------------|------------------------|------------------------------------------------------------------------------------------------------------|
| Abdalhamid B et al. | 2020           | Laboratory report      | To establish the optimal parameters for group testing of pooled specimens for the detection of SARS-CoV-2. |
| Aslam et al.        | 2020           | Policy review          | To analyse and provide policy recommendation for COVID-19 response                                         |
| Banskota S et al.   | 2020           | Narrative review       | To narratively summarise 15 apps for older adults during quarantine                                        |
| Binnicker MJ et al. | 2020           | Brief report           | To provide suggestions on robust and sustainable system for testing                                        |
| Brooks SK et al.    | 2020           | Rapid review           | Review of evidence on the psychological impact of quarantine                                               |
| Canova V et al.     | 2020           | Rapid assessment       | To report on an urgent assessment of possible community transmission                                       |
| Chen CM et al.      | 2020           | Case study             | To report on mass contact tracing and quarantine with big data                                             |
| Döhla M et al.      | 2020           | Technical report       | To evaluate COVID-19 rapid testing methods                                                                 |
| Eberhardt JN et al. | 2020           | Case study             | To report on multi-stage group testing schemes                                                             |
| Ekong I et al.      | 2020           | Rapid review           | To exploratory review of COVID-19 contact tracing methods                                                  |
| Farooq A et al.     | 2020           | Online survey          | To evaluate the impact of online information on the individual-level intention to voluntarily self-isolate |
| Favaloro EJ et al.  | 2020           | Commentary             | To summarise a list of contemporary laboratory tests                                                       |
| Ferretti L et al.   | 2020           | Simulation study       | To model key parameters for COVID-19 transmission                                                          |
| Gupta N et al.      | 2020           | Case study             | To describe laboratory response to COVID-19 in India                                                       |
| Han E et al.        | 2020           | Brief report           | To summarise of COVID-19 response in Taiwan                                                                |
| Hellewell J et al.  | 2020           | Simulation study       | To develop a stochastic COVID-19 transmission model                                                        |
| Hill K et al.       | 2020           | Technical report       | To describe the drive-through coronavirus testing                                                          |
| Kakimoto K et al.   | 2020           | Outbreak investigation | To investigate COVID-19 transmission on a cruise ship during quarantine                                    |
| Keeley AJ et al.    | 2020           | Technical report       | To communicate results of the roll-out of SARS-CoV-2 testing                                               |
| Klimburg et al.     | 2020           | Policy review          | To provide recommends digital contact tracing and quarantine tools.                                        |
| Klonowska et al.    | 2020           | Policy report          | To report on the digital COVID-19 response in the EU                                                       |
| Koh D et al.        | 2020           | Brief report           | To discuss COVID-19 case finding                                                                           |
| Lagier JC et al.    | 2020           | Case study             | To report on COVID-19 testing for repatriated flights passengers                                           |

|                            |      |                        |                                                                                                                                                                     |
|----------------------------|------|------------------------|---------------------------------------------------------------------------------------------------------------------------------------------------------------------|
| Lei L et al.               | 2020 | Survey study           | To assess anxiety and depression associated with COVID-19 quarantine                                                                                                |
| Manchein C et al.          | 2020 | Modelling study        | To analyse the mode of COVID-19 transmission                                                                                                                        |
| Marcel S et al.            | 2020 | Case study             | To describe the COVID-19 testing strategy in Switzerland                                                                                                            |
| Mark K et al.              | 2020 | Case study             | To describe COVID-19 testing in Lothian, Scotland                                                                                                                   |
| Meinert E et al.           | 2020 | Case study             | To describe an app to mitigate isolation due to social distancing                                                                                                   |
| Nussbaumer-Streit B et al. | 2020 | Rapid review           | To implement a rapid review on the effectiveness of quarantine during COVID-19                                                                                      |
| Omori R et al.             | 2020 | Modelling study        | To model COVID-19 transmission                                                                                                                                      |
| Parment WE et al.          | 2020 | Brief report           | To discuss the legal aspects in COVID-19 quarantine                                                                                                                 |
| Peçanha T et al.           | 2020 | Brief report           | To discuss the cardiovascular burden of physical inactivity during COVID-19 self-isolation                                                                          |
| Razai MS et al.            | 2020 | Brief report           | To discuss the psychological burden associated with COVID-19 self-isolation                                                                                         |
| Schulman R et al.          | 2020 | Brief report           | To discuss the false knowledge associated with COVID-19                                                                                                             |
| Schwartz J et al.          | 2020 | Case study             | To explore whether enhanced cooperation with local government and community institutions can effectively supplement state-centric public health epidemic responses. |
| Sjödín H. et al.           | 2020 | Simulation study       | To model the COVID-19 progression under different quarantine scenarios                                                                                              |
| Taghrir MH et al.          | 2020 | Policy review          | To review the effect of mass quarantine on COVID-19 in China.                                                                                                       |
| Tang B et al.              | 2020 | Simulation study       | To model COVID-19 transmission                                                                                                                                      |
| Tolia VM et al.            | 2020 | Evaluation study       | To evaluate COVID-19 testing program                                                                                                                                |
| Wang J et al.              | 2020 | Outbreak investigation | To investigate route of COVID-19 transmission during a hospital outbreak                                                                                            |
| Webster RK et al.          | 2020 | Rapid review           | To identify and summarise factors associated with quarantine adherence                                                                                              |
| Wilder-Smith A et al.      | 2020 | Narrative Review       | To review of existing COVID-19 self-isolation measures and factors that influencing their efficacy                                                                  |
| Xu JW et al.               | 2020 | Technical report       | To examine if isolation work in buildings with the example of the Diamond Princess as a case study                                                                  |
| Yamahata Y et al.          | 2020 | Case study             | To describe COVID-response in Cruise Ship Diamond Princess outbreak                                                                                                 |
| Yan Y et al.               | 2020 | Narrative Review       | To review COVID-19 laboratory testing methods                                                                                                                       |
| Yasaka TM et al.           | 2020 | Case study             | To develop an effective and non-intrusive contact tracing app                                                                                                       |

|                            |      |                        |                                                                                                       |
|----------------------------|------|------------------------|-------------------------------------------------------------------------------------------------------|
| Yen MY, Lin YE, et al.     | 2020 | Case study             | To report strategies for controlling a hospital outbreak                                              |
| Yen MY, Schwartz J, et al. | 2020 | Case study             | To report strategies to control a hospital outbreak                                                   |
| Zhang MX et al.            | 2020 | Simulation study       | To model the optimal transportation of COVID-19 patients to minimise subsequent transmission          |
| Zitek T.                   | 2020 | Technical report       | To discuss on the appropriate use of COVID-19 testing                                                 |
| McCombs A et al.           | 2020 | Simulation study       | To establish a network model of COVID-19 transmission to inform policy choices                        |
| Wang S et al.              | 2020 | Case study             | To describe a mini-program within the app WeChat for contact tracing                                  |
| Altmann S et al.           | 2020 | Online survey          | To investigate the user acceptability of a contact-tracing app                                        |
| Kowalski J et al.          | 2020 | Survey study           | To examine whether conspiracy beliefs have an adverse effect on COVID-19 medical guidelines adherence |
| Walrave M et al.           | 2020 | Survey study           | To study factors influencing the intention of using a contact-tracing app                             |
| Vicentini C et al.         | 2020 | Retrospective study    | To examine whether testing could be associated with variations in COVID-19 fatality.                  |
| Park Y et al.              | 2020 | Case study             | To describe COVID-19 testing strategy in Seoul                                                        |
| Nijsingh N et al.          | 2020 | Technical report       | To discussion on the reversibility of a contact tracing app                                           |
| Edjoc R et al.             | 2020 | Comparative study      | To compare the mathematical tool to Rt estimates in COVID-19 epidemic in Canada.                      |
| Bradshaw WJ et al.         | 2021 | Simulation study       | To examine whether a bidirectional contact tracing can effectively identify COVID-19 transmission.    |
| Magno L et al.             | 2020 | Case study             | To report COVID-19 testing strategy in Brazil                                                         |
| Rahaman KR et al.          | 2020 | Case study             | To describe COVID-19 testing strategy in Banglades                                                    |
| Falaschi Z et al.          | 2020 | Evaluation study       | To assess the computed tomography diagnostic accuracy against RT-PCR                                  |
| Brendish NJ et al.         | 2020 | Evaluation study       | To assess the point-of-care testing in reducing time to results                                       |
| DB S et al.                | 2020 | Brief report           | To describe COVID-19 response in different countries                                                  |
| Grassly NC et al.          | 2020 | Simulation study       | To assess different testing and isolation strategies on SARS-Cov-2 transmission                       |
| Cheng HY et al.            | 2020 | Clinical investigation | To investigate COVID-19 transmission among close contacts                                             |
| Jian SW et al.             | 2020 | Case study             | To report the COVID-19 contact tracing in Taiwan                                                      |

|                                                |      |                                   |                                                                                                            |
|------------------------------------------------|------|-----------------------------------|------------------------------------------------------------------------------------------------------------|
| Wei C et al.                                   | 2021 | Evaluation study                  | To compare COVID-19 population testing number and coverage on mortality                                    |
| Eilersen A et al.                              | 2020 | Simulation study                  | To assess different COVID-19 response strategies through mathematical modelling                            |
| Ruebush E et al.                               | 2021 | Case study                        | To report on the COVID-19 contact tracing in the US                                                        |
| Jonker M et al.                                | 2020 | Simulation study                  | To model the uptake of a COVID-19 contact tracing app                                                      |
| Chanda A. et al.                               | 2020 | Modelling study                   | To study the COVID-19 transmission dynamics in India                                                       |
| Salameh P                                      | 2020 | Evaluation study                  | To report COVID-19 epidemiology in countries of the Eastern Mediterranean Region                           |
| Brooks ZC et al.                               | 2020 | Simulation study                  | To model the effect of false-positive and false-negative COVID-19 testing results.                         |
| Mettler SK et al.                              | 2020 | Modelling study                   | To examine the indicator of diagnostic serial interval and its association with clinical onset of COVID-19 |
| Malheiro R et al.                              | 2020 | Case series                       | To report the characteristics of COVID-19 patients in Portugal                                             |
| Keeling MJ et al.                              | 2020 | Survey and modelling study        | To model the effect of contact tracing on COVID-19 transmission based on network data.                     |
| de Wolff T et al.                              | 2020 | Mathematical modelling            | To establish mathematical model to assess sample pooling method to enhance COVID-19 testing                |
| Frowde R et al.                                | 2020 | Brief report                      | Critique on the COVID-19 response in the UK                                                                |
| Reiss S et al.                                 | 2020 | Survey study and pathway analysis | To investigate psychological perceptions and defensive strategies towards COVID-19 and self-isolation.     |
| Kretzschmar ME et al.                          | 2020 | Mathematical modelling            | To identify factors for a successful COVID-19 contact tracing                                              |
| Smalley DL et al.                              | 2021 | Technical Report                  | To investigate the impact of pool testing and diluting RT-PCR testing reagent on COVID-19 testing.         |
| Bodas M et al. <i>Isr J Health Policy Res.</i> | 2020 | Survey research                   | To assess public attitudes toward COVID-19                                                                 |
| Li S et al.                                    | 2020 | Cross-sectional survey            | To investigate individual factors such as internet use and the uptake of COVID-19 prevention methods       |
| Gray N et al.                                  | 2020 | Modelling study                   | To assess strategies to end the lockdown for COVID-19 control.                                             |
| Smyrlaki I et al.                              | 2020 | Technical report                  | To investigate the extracting method on rapid COVID-19 testing.                                            |
| Bilinski A et al.                              | 2020 | Mathematical modelling            | To assess contact tracing strategies within the ease of COVID-19 control measures.                         |

|                                             |      |                        |                                                                                                                                                                   |
|---------------------------------------------|------|------------------------|-------------------------------------------------------------------------------------------------------------------------------------------------------------------|
| Aleta A et al.                              | 2020 | Mathematical modelling | To model the impact of testing, contact tracing and household quarantine on second COVID-19 wave.                                                                 |
| Kaspar K.                                   | 2020 | Survey research        | To examine central cognitive variables influencing individuals' motivations for up-taking social distancing and apps for COVID-19 control                         |
| Wells CR et al.                             | 2021 | Mathematical modelling | To study optimal COVID-19 quarantine and testing strategies.                                                                                                      |
| Huang Z et al.                              | 2020 | Evaluation study       | To compare the performance of the contact tracing app and a wearable tag-based real-time locating system                                                          |
| Yap KY et al.                               | 2020 | Technical report       | To present a COVID-19 web-app                                                                                                                                     |
| Ezeibe CC et al.                            | 2020 | Qualitative study      | To investigate the impact of political distrust on COVID-19 pandemic in Nigeria.                                                                                  |
| Gopaul R et al.                             | 2020 | Evaluation study       | To assess the accuracy of COVID-19 nasopharyngeal swab PCR testing                                                                                                |
| Ferrari D et al.                            | 2020 | Evaluation study       | To examine whether combining RT-PCR with routine blood test can reduce false-negative COVID-19 testing.                                                           |
| Bodas M et al.<br>Health Aff<br>(Millwood). | 2020 | Survey research        | To assess public attitudes toward COVID-19                                                                                                                        |
| Deckert A et al.                            | 2020 | Simulation study       | To simulate and compare results of the pooled-sample strategies for COVID-19 mass testing                                                                         |
| Li Y et al.                                 | 2020 | Evaluation study       | To evaluate the consistency of COVID-19 RT-PCR testing results in hospitalised patients.                                                                          |
| Chiu WA et al.                              | 2020 | Modelling study        | To assess the effect of relaxation of COVID-19 control measures.                                                                                                  |
| Indenbaum V et al.                          | 2020 | Evaluation study       | To compare COVID-19 antibody testing to RT-PCR testing results                                                                                                    |
| Müller M et al.                             | 2020 | Simulation study       | To examine whether frequent sampling of non-symptomatic but infectious individuals in addition to testing symptomatic individuals can improve COVID-19 management |
| Xie K et al.                                | 2020 | Mathematical modelling | To study the mechanism of the risk perception effect on social distancing                                                                                         |
| Jung J et al.                               | 2020 | Case study             | To study the impact of mandatory COVID-19 testing before releasing individuals from the 14-day quarantine in Incheon, Korea.                                      |
| Hong K et al.                               | 2020 | Technical report       | To examine the indicator of the Serial Interval of COVID-19 for contact tracing                                                                                   |
| Gul S et al.                                | 2020 | Simulation study       | To investigate probability of COVID-19 transmission via different social network.                                                                                 |
| Sawano T et al.                             | 2020 | Case series            | To report the factors associated with regional variation of COVID-19 incidence in Japan                                                                           |



|                    |      |                                 |                                                                                                                          |
|--------------------|------|---------------------------------|--------------------------------------------------------------------------------------------------------------------------|
| Jacofsky D et al.  | 2020 | Technical report                | To present a COVID-19 antibody tests                                                                                     |
| Szocska M et al.   | 2020 | Case study                      | To report on using data on call detail records to monitor physical morbidity                                             |
| Alger J et al.     | 2020 | Evaluation study                | To study the validity of COVID-19 antibody rapid tests                                                                   |
| Schrager JD et al. | 2020 | Cross-sectional usability study | To test whether adult users could understand and recall the information provided by a COVID-19 web-based tool.           |
| Bai AD et al.      | 2020 | Point-prevalence study          | To estimate the prevalence of COVID-19 among in-hospital patients                                                        |
| Flynn EF et al.    | 2020 | Case study                      | To report the design and implementation of COVID-19 drive-through testing for children and pediatric health care workers |
| Brendish NJ et al. | 2020 | Non-randomised clinical study   | To assess the accuracy and effectiveness of point of care COVID-19 testing                                               |
| Dinnes J et al.    | 2021 | Systematic review               | To assess the diagnostic accuracy of COVID-19 point-of-care antigen and molecular-based tests                            |
| Abera A et al.     | 2020 | Case study                      | To report on establishing a COVID-19 testing laboratory in Ethiopia                                                      |
| Wu DC et al.       | 2020 | Survey research                 | To report on the self-reported COVID symptoms from a national-representative poll in Canada                              |
| Younes N et al.    | 2020 | Narrative review                | To discuss laboratory and surveillance technologies for COVID-19 testing                                                 |

Table S2: The methodological rigour assessment of included studies by the CASP Qualitative Studies Checklist

| Authors                    | Published year | 1. Was there a clear statement of the aims of the research? | 2. Is a qualitative methodology appropriate? | 3. Was the research design appropriate to address the aims of the research? | 4. Was the recruitment strategy appropriate to the aims of the research? | 5. Was the data collected in a way that addressed the research issue? | 6. Has the relationship between researcher and participants been adequately considered? | 7. Have ethical issues been taken into consideration? | 8. Was the data analysis sufficiently rigorous? | 9. Is there a clear statement of findings? | 10. How valuable is the research? |
|----------------------------|----------------|-------------------------------------------------------------|----------------------------------------------|-----------------------------------------------------------------------------|--------------------------------------------------------------------------|-----------------------------------------------------------------------|-----------------------------------------------------------------------------------------|-------------------------------------------------------|-------------------------------------------------|--------------------------------------------|-----------------------------------|
| Abdalhamid B et al.        | 2020           | Yes                                                         | Yes                                          | Yes                                                                         | Yes                                                                      | Yes                                                                   | N/A                                                                                     | Yes                                                   | Yes                                             | Yes                                        | Good                              |
| Aslam et al.               | 2020           | Yes                                                         | Yes                                          | Yes                                                                         | Yes                                                                      | Yes                                                                   | N/A                                                                                     | N/A                                                   | Yes                                             | Yes                                        | Good                              |
| Banskota S et al.          | 2020           | Yes                                                         | Yes                                          | Yes                                                                         | Yes                                                                      | Yes                                                                   | N/A                                                                                     | N/A                                                   | Yes                                             | Yes                                        | Good                              |
| Binnicker MJ et al.        | 2020           | Yes                                                         | N/A                                          | N/A                                                                         | N/A                                                                      | N/A                                                                   | N/A                                                                                     | N/A                                                   | N/A                                             | Yes                                        | Moderate                          |
| Brooks SK et al.           | 2020           | Yes                                                         | Yes                                          | Yes                                                                         | Yes                                                                      | Yes                                                                   | N/A                                                                                     | N/A                                                   | Yes                                             | Yes                                        | Good                              |
| Canova V et al.            | 2020           | Yes                                                         | Yes                                          | Yes                                                                         | Yes                                                                      | Yes                                                                   | N/A                                                                                     | N/A                                                   | Yes                                             | Yes                                        | Good                              |
| Chen CM et al.             | 2020           | Yes                                                         | Yes                                          | Yes                                                                         | Yes                                                                      | Yes                                                                   | N/A                                                                                     | N/A                                                   | Yes                                             | Yes                                        | Good                              |
| Döhla M et al.             | 2020           | Yes                                                         | Yes                                          | Yes                                                                         | Yes                                                                      | Yes                                                                   | N/A                                                                                     | N/A                                                   | Yes                                             | Yes                                        | Good                              |
| Eberhardt JN et al.        | 2020           | Yes                                                         | Yes                                          | Yes                                                                         | Yes                                                                      | Yes                                                                   | N/A                                                                                     | N/A                                                   | Yes                                             | Yes                                        | Good                              |
| Ekong I et al.             | 2020           | Yes                                                         | Yes                                          | Yes                                                                         | Yes                                                                      | Yes                                                                   | N/A                                                                                     | N/A                                                   | Yes                                             | Yes                                        | Good                              |
| Farooq A et al.            | 2020           | Yes                                                         | Yes                                          | Yes                                                                         | Yes                                                                      | Yes                                                                   | N/A                                                                                     | N/A                                                   | Yes                                             | Yes                                        | Good                              |
| Favaloro EJ et al.         | 2020           | Yes                                                         | N/A                                          | N/A                                                                         | N/A                                                                      | N/A                                                                   | N/A                                                                                     | N/A                                                   | N/A                                             | Yes                                        | Moderate                          |
| Ferretti L et al.          | 2020           | Yes                                                         | Yes                                          | Yes                                                                         | Yes                                                                      | Yes                                                                   | N/A                                                                                     | N/A                                                   | Yes                                             | Yes                                        | Good                              |
| Gupta N et al.             | 2020           | Yes                                                         | Yes                                          | Yes                                                                         | Yes                                                                      | Yes                                                                   | N/A                                                                                     | N/A                                                   | Yes                                             | Yes                                        | Good                              |
| Han E et al.               | 2020           | Yes                                                         | N/A                                          | N/A                                                                         | N/A                                                                      | N/A                                                                   | N/A                                                                                     | N/A                                                   | N/A                                             | Yes                                        | Moderate                          |
| Hellewell J et al.         | 2020           | Yes                                                         | Yes                                          | Yes                                                                         | Yes                                                                      | Yes                                                                   | N/A                                                                                     | N/A                                                   | Yes                                             | Yes                                        | Good                              |
| Hill K et al.              | 2020           | Yes                                                         | N/A                                          | N/A                                                                         | N/A                                                                      | N/A                                                                   | N/A                                                                                     | N/A                                                   | N/A                                             | Yes                                        | Moderate                          |
| Kakimoto K et al.          | 2020           | Yes                                                         | Yes                                          | Yes                                                                         | Yes                                                                      | Yes                                                                   | N/A                                                                                     | N/A                                                   | Yes                                             | Yes                                        | Good                              |
| Keeley AJ et al.           | 2020           | Yes                                                         | Yes                                          | Yes                                                                         | Yes                                                                      | Yes                                                                   | N/A                                                                                     | N/A                                                   | Yes                                             | Yes                                        | Good                              |
| Klimburg et al.            | 2020           | Yes                                                         | Yes                                          | Yes                                                                         | Yes                                                                      | Yes                                                                   | N/A                                                                                     | N/A                                                   | Yes                                             | Yes                                        | Good                              |
| Klonowska et al.           | 2020           | Yes                                                         | Yes                                          | Yes                                                                         | Yes                                                                      | Yes                                                                   | N/A                                                                                     | N/A                                                   | Yes                                             | Yes                                        | Good                              |
| Koh D et al.               | 2020           | Yes                                                         | N/A                                          | N/A                                                                         | N/A                                                                      | N/A                                                                   | N/A                                                                                     | N/A                                                   | N/A                                             | Yes                                        | Moderate                          |
| Lagier JC et al.           | 2020           | Yes                                                         | Yes                                          | Yes                                                                         | Yes                                                                      | Yes                                                                   | N/A                                                                                     | N/A                                                   | Yes                                             | Yes                                        | Good                              |
| Lei L et al.               | 2020           | Yes                                                         | Yes                                          | Yes                                                                         | Yes                                                                      | Yes                                                                   | N/A                                                                                     | N/A                                                   | Yes                                             | Yes                                        | Good                              |
| Manchein C et al.          | 2020           | Yes                                                         | Yes                                          | Yes                                                                         | Yes                                                                      | Yes                                                                   | N/A                                                                                     | N/A                                                   | Yes                                             | Yes                                        | Good                              |
| Marcel S et al.            | 2020           | Yes                                                         | Yes                                          | Yes                                                                         | Yes                                                                      | Yes                                                                   | N/A                                                                                     | N/A                                                   | Yes                                             | Yes                                        | Good                              |
| Mark K et al.              | 2020           | Yes                                                         | Yes                                          | Yes                                                                         | Yes                                                                      | Yes                                                                   | N/A                                                                                     | N/A                                                   | Yes                                             | Yes                                        | Good                              |
| Meinert E et al.           | 2020           | Yes                                                         | Yes                                          | Yes                                                                         | Yes                                                                      | Yes                                                                   | N/A                                                                                     | N/A                                                   | Yes                                             | Yes                                        | Good                              |
| Nussbaumer-Streit B et al. | 2020           | Yes                                                         | Yes                                          | Yes                                                                         | Yes                                                                      | Yes                                                                   | N/A                                                                                     | N/A                                                   | Yes                                             | Yes                                        | Good                              |

|                            |      |     |     |     |     |     |     |     |     |     |          |
|----------------------------|------|-----|-----|-----|-----|-----|-----|-----|-----|-----|----------|
| Omori R et al.             | 2020 | Yes | Yes | Yes | Yes | Yes | N/A | N/A | Yes | Yes | Good     |
| Parment WE et al.          | 2020 | Yes | N/A | N/A | N/A | N/A | N/A | N/A | N/A | Yes | Moderate |
| Peçanha T et al.           | 2020 | Yes | N/A | N/A | N/A | N/A | N/A | N/A | N/A | Yes | Moderate |
| Razai MS et al.            | 2020 | Yes | N/A | N/A | N/A | N/A | N/A | N/A | N/A | Yes | Moderate |
| Schulman R et al.          | 2020 | Yes | N/A | N/A | N/A | N/A | N/A | N/A | N/A | Yes | Moderate |
| Schwartz J et al.          | 2020 | Yes | Yes | Yes | Yes | Yes | N/A | N/A | Yes | Yes | Good     |
| Sjödin H. et al.           | 2020 | Yes | Yes | Yes | Yes | Yes | N/A | N/A | Yes | Yes | Good     |
| Taghrir MH et al.          | 2020 | Yes | Yes | Yes | Yes | Yes | N/A | N/A | Yes | Yes | Good     |
| Tang B et al.              | 2020 | N/A | N/A | N/A | N/A | N/A | N/A | N/A | Yes | N/A | Moderate |
| Tolia VM et al.            | 2020 | Yes | Yes | Yes | Yes | Yes | N/A | N/A | Yes | Yes | Good     |
| Wang J et al.              | 2020 | Yes | Yes | Yes | Yes | Yes | N/A | N/A | Yes | Yes | Good     |
| Webster RK et al.          | 2020 | Yes | Yes | Yes | Yes | Yes | N/A | N/A | Yes | Yes | Good     |
| Wilder-Smith A et al.      | 2020 | Yes | Yes | Yes | Yes | Yes | N/A | N/A | Yes | Yes | Good     |
| Xu JW et al.               | 2020 | Yes | Yes | Yes | Yes | Yes | N/A | N/A | Yes | Yes | Good     |
| Yamahata Y et al.          | 2020 | Yes | Yes | Yes | Yes | Yes | N/A | N/A | Yes | Yes | Good     |
| Yan Y et al.               | 2020 | Yes | Yes | Yes | Yes | Yes | N/A | N/A | Yes | Yes | Good     |
| Yasaka TM et al.           | 2020 | Yes | Yes | Yes | Yes | Yes | N/A | N/A | Yes | Yes | Good     |
| Yen MY, Lin YE, et al.     | 2020 | Yes | Yes | Yes | Yes | Yes | N/A | N/A | Yes | Yes | Good     |
| Yen MY, Schwartz J, et al. | 2020 | Yes | Yes | Yes | Yes | Yes | N/A | N/A | Yes | Yes | Good     |
| Zhang MX et al.            | 2020 | Yes | Yes | Yes | Yes | Yes | N/A | N/A | Yes | Yes | Good     |
| Zitek T.                   | 2020 | Yes | N/A | N/A | N/A | N/A | N/A | N/A | N/A | Yes | Moderate |
| McCombs A et al.           | 2020 | Yes | Yes | Yes | Yes | Yes | N/A | N/A | Yes | Yes | Good     |
| Wang S et al.              | 2020 | Yes | Yes | Yes | Yes | Yes | N/A | N/A | Yes | Yes | Good     |
| Altmann S et al.           | 2020 | Yes | Yes | Yes | Yes | Yes | N/A | N/A | Yes | Yes | Good     |
| Kowalski J et al.          | 2020 | Yes | Yes | Yes | Yes | Yes | N/A | N/A | Yes | Yes | Good     |
| Walrave M et al.           | 2020 | Yes | Yes | Yes | Yes | Yes | N/A | N/A | Yes | Yes | Good     |
| Vicentini C et al.         | 2020 | Yes | Yes | Yes | Yes | Yes | N/A | N/A | Yes | Yes | Good     |
| Park Y et al.              | 2020 | Yes | Yes | Yes | Yes | Yes | N/A | N/A | Yes | Yes | Good     |
| Nijsingh N et al.          | 2020 | Yes | N/A | N/A | N/A | N/A | N/A | N/A | N/A | Yes | Moderate |
| Edjoc R et al.             | 2020 | Yes | Yes | Yes | Yes | Yes | N/A | N/A | Yes | Yes | Good     |
| Bradshaw WJ et al.         | 2021 | Yes | Yes | Yes | Yes | Yes | N/A | N/A | Yes | Yes | Good     |
| Magno L et al.             | 2020 | Yes | Yes | Yes | Yes | Yes | N/A | N/A | Yes | Yes | Good     |
| Rahaman KR et al.          | 2020 | Yes | Yes | Yes | Yes | Yes | N/A | N/A | Yes | Yes | Good     |
| Falaschi Z et al.          | 2020 | Yes | Yes | Yes | Yes | Yes | N/A | N/A | Yes | Yes | Good     |
| Brendish NJ et al.         | 2020 | Yes | Yes | Yes | Yes | Yes | N/A | N/A | Yes | Yes | Good     |
| DB S et al.                | 2020 | Yes | N/A | N/A | N/A | N/A | N/A | N/A | N/A | Yes | Moderate |
| Grassly NC et al.          | 2020 | Yes | Yes | Yes | Yes | Yes | N/A | N/A | Yes | Yes | Good     |
| Cheng HY et al.            | 2020 | Yes | Yes | Yes | Yes | Yes | N/A | N/A | Yes | Yes | Good     |

|                                         |      |     |     |     |     |     |     |     |     |     |          |
|-----------------------------------------|------|-----|-----|-----|-----|-----|-----|-----|-----|-----|----------|
| Jian SW et al.                          | 2020 | Yes | Yes | Yes | Yes | Yes | N/A | N/A | Yes | Yes | Good     |
| Wei C et al.                            | 2021 | Yes | Yes | Yes | Yes | Yes | N/A | N/A | Yes | Yes | Good     |
| Eilersen A et al.                       | 2020 | Yes | Yes | Yes | Yes | Yes | N/A | N/A | Yes | Yes | Good     |
| Ruebush E et al.                        | 2021 | Yes | Yes | Yes | Yes | Yes | N/A | N/A | Yes | Yes | Good     |
| Jonker M et al.                         | 2020 | Yes | Yes | Yes | Yes | Yes | N/A | N/A | Yes | Yes | Good     |
| Chanda A. et al.                        | 2020 | Yes | Yes | Yes | Yes | Yes | N/A | N/A | Yes | Yes | Good     |
| Salameh P                               | 2020 | Yes | Yes | Yes | Yes | Yes | N/A | N/A | Yes | Yes | Good     |
| Brooks ZC et al.                        | 2020 | Yes | Yes | Yes | Yes | Yes | N/A | N/A | Yes | Yes | Good     |
| Mettler SK et al.                       | 2020 | Yes | Yes | Yes | Yes | Yes | N/A | N/A | Yes | Yes | Good     |
| Malheiro R et al.                       | 2020 | Yes | Yes | Yes | Yes | Yes | N/A | N/A | Yes | Yes | Good     |
| Keeling MJ et al.                       | 2020 | Yes | Yes | Yes | Yes | Yes | N/A | N/A | Yes | Yes | Good     |
| de Wolff T et al.                       | 2020 | Yes | Yes | Yes | Yes | Yes | N/A | N/A | Yes | Yes | Good     |
| Frowde R et al.                         | 2020 | Yes | N/A | N/A | N/A | N/A | N/A | N/A | N/A | Yes | Moderate |
| Reiss S et al.                          | 2020 | Yes | Yes | Yes | Yes | Yes | N/A | N/A | Yes | Yes | Good     |
| Kretzschmar ME et al.                   | 2020 | Yes | Yes | Yes | Yes | Yes | N/A | N/A | Yes | Yes | Good     |
| Smalley DL et al.                       | 2021 | Yes | Yes | Yes | Yes | Yes | N/A | N/A | Yes | Yes | Good     |
| Bodas M et al. Isr J Health Policy Res. | 2020 | Yes | Yes | Yes | Yes | Yes | N/A | N/A | Yes | Yes | Good     |
| Li S et al.                             | 2020 | Yes | Yes | Yes | Yes | Yes | N/A | N/A | Yes | Yes | Good     |
| Gray N et al.                           | 2020 | Yes | Yes | Yes | Yes | Yes | N/A | N/A | Yes | Yes | Good     |
| Smyrlaki I et al.                       | 2020 | Yes | Yes | Yes | Yes | Yes | N/A | N/A | Yes | Yes | Good     |
| Bilinski A et al.                       | 2020 | Yes | Yes | Yes | Yes | Yes | N/A | N/A | Yes | Yes | Good     |
| Aleta A et al.                          | 2020 | Yes | Yes | Yes | Yes | Yes | N/A | N/A | Yes | Yes | Good     |
| Kaspar K.                               | 2020 | Yes | Yes | Yes | Yes | Yes | N/A | N/A | Yes | Yes | Good     |
| Wells CR et al.                         | 2021 | Yes | Yes | Yes | Yes | Yes | N/A | N/A | Yes | Yes | Good     |
| Huang Z et al.                          | 2020 | Yes | Yes | Yes | Yes | Yes | N/A | N/A | Yes | Yes | Good     |
| Yap KY et al.                           | 2020 | Yes | N/A | N/A | N/A | N/A | N/A | N/A | N/A | Yes | Moderate |
| Ezeibe CC et al.                        | 2020 | Yes | Yes | Yes | Yes | Yes | N/A | N/A | Yes | Yes | Good     |
| Gopaul R et al.                         | 2020 | Yes | Yes | Yes | Yes | Yes | N/A | N/A | Yes | Yes | Good     |
| Ferrari D et al.                        | 2020 | Yes | Yes | Yes | Yes | Yes | N/A | N/A | Yes | Yes | Good     |
| Bodas M et al. Health Aff (Millwood).   | 2020 | Yes | Yes | Yes | Yes | Yes | N/A | N/A | Yes | Yes | Good     |
| Deckert A et al.                        | 2020 | Yes | Yes | Yes | Yes | Yes | N/A | N/A | Yes | Yes | Good     |
| Li Y et al.                             | 2020 | Yes | Yes | Yes | Yes | Yes | N/A | N/A | Yes | Yes | Good     |
| Chiu WA et al.                          | 2020 | Yes | Yes | Yes | Yes | Yes | N/A | N/A | Yes | Yes | Good     |
| Indenbaum V et al.                      | 2020 | Yes | Yes | Yes | Yes | Yes | N/A | N/A | Yes | Yes | Good     |
| Müller M et al.                         | 2020 | Yes | Yes | Yes | Yes | Yes | N/A | N/A | Yes | Yes | Good     |
| Xie K et al.                            | 2020 | Yes | Yes | Yes | Yes | Yes | N/A | N/A | Yes | Yes | Good     |
| Jung J et al.                           | 2020 | Yes | Yes | Yes | Yes | Yes | N/A | N/A | Yes | Yes | Good     |
| Hong K et al.                           | 2020 | Yes | Yes | Yes | Yes | Yes | N/A | N/A | Yes | Yes | Good     |
| Gul S et al.                            | 2020 | Yes | Yes | Yes | Yes | Yes | N/A | N/A | Yes | Yes | Good     |
| Sawano T et al.                         | 2020 | Yes | Yes | Yes | Yes | Yes | N/A | N/A | Yes | Yes | Good     |
| Jacofsky D et al.                       | 2020 | Yes | N/A | N/A | N/A | N/A | N/A | N/A | N/A | Yes | Moderate |
| Szocska M et al.                        | 2020 | Yes | Yes | Yes | Yes | Yes | N/A | N/A | Yes | Yes | Good     |
| Alger J et al.                          | 2020 | Yes | Yes | Yes | Yes | Yes | N/A | N/A | Yes | Yes | Good     |

|                    |      |     |     |     |     |     |     |     |     |     |      |
|--------------------|------|-----|-----|-----|-----|-----|-----|-----|-----|-----|------|
| Schrager JD et al. | 2020 | Yes | Yes | Yes | Yes | Yes | N/A | N/A | Yes | Yes | Good |
| Bai AD et al.      | 2020 | Yes | Yes | Yes | Yes | Yes | N/A | N/A | Yes | Yes | Good |
| Flynn EF et al.    | 2020 | Yes | Yes | Yes | Yes | Yes | N/A | N/A | Yes | Yes | Good |
| Brendish NJ et al. | 2020 | Yes | Yes | Yes | Yes | Yes | N/A | N/A | Yes | Yes | Good |
| Dinnes J et al.    | 2021 | Yes | Yes | Yes | Yes | Yes | N/A | N/A | Yes | Yes | Good |
| Abera A et al.     | 2020 | Yes | Yes | Yes | Yes | Yes | N/A | N/A | Yes | Yes | Good |
| Wu DC et al.       | 2020 | Yes | Yes | Yes | Yes | Yes | N/A | N/A | Yes | Yes | Good |
| Younes N et al.    | 2020 | Yes | Yes | Yes | Yes | Yes | N/A | N/A | Yes | Yes | Good |

**Supplementary section three: List of reviewed articles:****For the first review between May 2019 and May 2020**

Klonowska, Klaudia, and Pieter Bindt. The COVID-19 Pandemic: Two Waves of Technological Responses in the European Union. Hague Centre for Strategic Studies, 2020.

Aslam H, and Rohan H. Fighting COVID-19: Lessons from China, South Korea and Japan. Sustainable Development Policy Institute, 2020.

Klimburg A, Faesen L, Verhagen P, Mirtl P. Pandemic Mitigation in the Digital Age: Digital Epidemiological Measures to Combat the Coronavirus Pandemic. Hague Centre for Strategic Studies. 2020.

Parment WE, Sinha MS. COVID-19 - The Law and Limits of Quarantine. *N Engl J Med*. 2020 Apr 9;382(15):e28. doi: 10.1056/NEJMp2004211. Epub 2020 Mar 18.

Yasaka TM, Lehrich BM, Sahyouni R. Peer-to-Peer Contact Tracing: Development of a Privacy-Preserving Smartphone App. *JMIR Mhealth Uhealth*. 2020 Apr 7;8(4):e18936. doi: 10.2196/1893

Taghrir MH, Akbarialiabad H, Ahmadi Marzaleh M. Efficacy of Mass Quarantine as Leverage of Health System Governance During COVID-19 Outbreak: A Mini Policy Review. *Arch Iran Med*. 2020 Apr 1;23(4):265-267. doi: 10.34172/aim.2020.08.

Hill K, Campbell R, Mutch C, Koch O, Mackintosh C. Drive-through testing in COVID-19: experience from NHS Lothian. *Clin Med (Lond)*. 2020 May;20(3):290-291. doi: 10.7861/clinmed.2020-0160. Epub 2020 May 1.

Ferretti L, Wymant C, Kendall M, et al. Quantifying SARS-CoV-2 transmission suggests epidemic control with digital contact tracing. *Science*. 2020 May 8;368(6491):eabb6936. doi: 10.1126/science.abb6936. Epub 2020 Mar 31.

Xu JW, Wang XY, Qin Z, et al. Deep thought of COVID-19 based on Diamond Princess's quarantine and home quarantine. *Eur Rev Med Pharmacol Sci*. 2020 Apr;24(7):4027-4029. doi: 10.26355/eurrev\_202004\_20872.

Yan Y, Chang L, Wang L. Laboratory testing of SARS-CoV, MERS-CoV, and SARS-CoV-2 (2019-nCoV): Current status, challenges, and countermeasures. *Rev Med Virol*. 2020 May;30(3):e2106. doi: 10.1002/rmv.2106. Epub 2020 Apr 17.

Wilder-Smith A, Freedman DO. Isolation, quarantine, social distancing and community containment: pivotal role for old-style public health measures in the novel coronavirus (2019-nCoV) outbreak. *J Travel Med*. 2020 Mar 13;27(2):taaa020. doi: 10.1093/jtm/taaa020.

Abdalhamid B, Bilder CR, McCutchen EL, Hinrichs SH, Koepsell SA, Iwen PC. Assessment of Specimen Pooling to Conserve SARS CoV-2 Testing Resources. *Am J Clin Pathol*. 2020 May 5;153(6):715-718. doi: 10.1093/ajcp/aqaa064.

Mark K, Steel K, Stevenson J, Evans C, et al. Coronavirus disease (COVID-19) Community Testing Team in Scotland: A 14-day review, 6 to 20 February 2020, *Euro Surveill*. 2020 Mar;25(12):2000217. doi: 10.2807/1560-7917.ES.2020.25.12.2000217.

Binnicker MJ. Emergence of a Novel Coronavirus Disease (COVID-19) and the Importance of Diagnostic Testing: Why Partnership between Clinical Laboratories, Public Health Agencies, and Industry Is Essential to Control the Outbreak. *Clin Chem*. 2020 May 1;66(5):664-666. doi: 10.1093/clinchem/hvaa071.

Lagier JC, Colson P, Tissot Dupont H, et al. Testing the repatriated for SARS-Cov2: Should laboratory-based quarantine replace traditional quarantine? *Travel Med Infect Dis.* 2020 Mar-Apr;34:101624. doi: 10.1016/j.tmaid.2020.101624. Epub 2020 Mar 14.

Ekong I, Chukwu E, Chukwu M. COVID-19 Mobile Positioning Data Contact Tracing and Patient Privacy Regulations: Exploratory Search of Global Response Strategies and the Use of Digital Tools in Nigeria. *JMIR Mhealth Uhealth.* 2020 Apr 27;8(4):e19139. doi: 10.2196/19139.

Farooq A, Laato S, Islam AKMN. Impact of Online Information on Self-Isolation Intention During the COVID-19 Pandemic: Cross-Sectional Study. *J Med Internet Res.* 2020 May 6;22(5):e19128. doi: 10.2196/19128.

Hellewell J, Abbott S, Gimma A, et al. Feasibility of controlling COVID-19 outbreaks by isolation of cases and contacts Version 2. *Lancet Glob Health.* 2020 Apr;8(4):e488-e496. doi: 10.1016/S2214-109X(20)30074-7. Epub 2020 Feb 28.

Nussbaumer-Streit B, Mayr V, Dobrescu AI, et al. Quarantine alone or in combination with other public health measures to control COVID-19: a rapid review. *Cochrane Database Syst Rev.* 2020 Apr 8;4(4):CD013574. doi: 10.1002/14651858.CD013574.

Favaloro EJ, Lippi G. Recommendations for Minimal Laboratory Testing Panels in Patients with COVID-19: Potential for Prognostic Monitoring. *Semin Thromb Hemost.* 2020 Apr;46(3):379-382. doi: 10.1055/s-0040-1709498. Epub 2020 Apr 12.

Keeley AJ, Evans C, Colton H, et al. Roll-out of SARS-CoV-2 testing for healthcare workers at a large NHS Foundation Trust in the United Kingdom, March 2020. *Euro Surveill.* 2020 Apr;25(14):2000433. doi:10.2807/1560-7917.ES.2020.25.14.2000433.

Gupta N, Potdar V, Prahara J, Giri S et al. Laboratory preparedness for SARS-CoV-2 testing in India: Harnessing a network of Virus Research & Diagnostic Laboratories. *Indian J Med Res.* 2020 Feb & Mar;151(2 & 3):216-225. doi: 10.4103/ijmr.IJMR\_594\_20.

Chen CM, Jyan HW, Chien SC, et al. Containing COVID-19 Among 627,386 Persons in Contact With the Diamond Princess Cruise Ship Passengers Who Disembarked in Taiwan: Big Data Analytics. *J Med Internet Res.* 2020 May 5;22(5):e19540. doi: 10.2196/19540.

Eberhardt J.N., Breuckmann N.P., Eberhardt C.S. Multi-Stage Group Testing Improves Efficiency of Large-Scale COVID-19 Screening. *J Clin Virol.* 2020 Apr 23;128:104382. doi: 10.1016/j.jcv.2020.104382

Webster R.K., Brooks S.K., Smith L.E., Woodland L., Wessely S., Rubin G.J. *Public Health.* 2020 May;182:163-169. doi: 10.1016/j.puhe.2020.03.007. *Public Health.* doi:10.1016/j.puhe.2020.03.007

Döhla M, Boesecke C, Schulte B, et al. Rapid point-of-care testing for SARS-CoV-2 in a community screening setting shows low sensitivity. *Public Health.* 2020 May;182:170-172. doi: 10.1016/j.puhe.2020.04.009. Epub 2020 Apr 18.

Yen MY, Lin YE, Lee CH, et al. Taiwan's traffic control bundle and the elimination of nosocomial severe acute respiratory syndrome among healthcare workers. *J Hosp Infect.* 2011 Apr;77(4):332-7. doi: 10.1016/j.jhin.2010.12.002. Epub 2011 Feb 12.

Schwartz J, Yen MY. Toward a collaborative model of pandemic preparedness and response: Taiwan's changing approach to pandemics. *J Microbiol Immunol Infect.* 2017 Apr;50(2):125-132. doi: 10.1016/j.jmii.2016.08.010. Epub 2016 Dec 18.

Yen MY, Schwartz J, Chen SY, King CC, Yang GY, Hsueh PR. Interrupting COVID-19 transmission by implementing enhanced traffic control bundling: Implications for global prevention and control efforts. *J Microbiol Immunol Infect*. 2020 Mar 14;S1684-1182(20)30071-2. doi: 10.1016/j.jmii.2020.03.011. Online ahead of print.

Salathé M, Althaus CL, Neher R, et al. COVID-19 epidemic in Switzerland: on the importance of testing, contact tracing and isolation. *Swiss Med Wkly*. 2020 Mar 19;150:w20225. doi: 10.4414/smw.2020.20225. eCollection 2020 Mar 9.

Schulman R and Siman-Tov D. From Biological Weapons to Miracle Drugs: Fake News about the Coronavirus Pandemic. Institute for National Security Studies, 2020, [www.jstor.org/stable/resrep23529](http://www.jstor.org/stable/resrep23529). Accessed 31 May 2020.

Chiew CJ, Li Z, Lee VJ. Reducing onward spread of COVID-19 from imported cases: quarantine and 'stay at home' measures for travellers and returning residents to Singapore. *J Travel Med*. 2020;27(3).

Tolia VM, Chan TC, Castillo EM. Preliminary Results of Initial Testing for Coronavirus (COVID-19) in the Emergency Department. *West J Emerg Med*. 2020;21(3):503-6.

Manchein C, Brugnago EL, da Silva RM, Mendes CFO, Beims MW. Strong correlations between power-law growth of COVID-19 in four continents and the inefficiency of soft quarantine strategies. *Chaos*. 2020;30(4):041102.

Sjodin H, Wilder-Smith A, Osman S, Farooq Z, Rocklov J. Only strict quarantine measures can curb the coronavirus disease (COVID-19) outbreak in Italy, 2020. *Euro Surveill*. 2020;25(13).

Omori R, Mizumoto K, Chowell G. Changes in testing rates could mask the novel coronavirus disease (COVID-19) growth rate. *Int J Infect Dis*. 2020;94:116-8.

Koh D, Cunningham AC. Counting Coronavirus Disease 2019 (COVID-19) Cases: Case Definitions, Screened Populations and Testing Techniques Matter. *Ann Acad Med Singapore*. 2020;49(3):161-5.

Zitek T. The Appropriate Use of Testing for COVID-19. *West J Emerg Med*. 2020;21(3):470-2.

Reusken CB, Buiting A, Bleeker-Rovers C, et al. Rapid assessment of regional SARS-CoV-2 community transmission through a convenience sample of healthcare workers, the Netherlands, March 2020. *Euro Surveill*. 2020;25(12).

Banskota S, Healy M, Goldberg EM. 15 Smartphone Apps for Older Adults to Use While in Isolation During the COVID-19 Pandemic. *West J Emerg Med*. 2020;21(3):514-25.

Meinert E, Milne-Ives M, Surodina S, Lam C. Agile Requirements Engineering and Software Planning for a Digital Health Platform to Engage the Effects of Isolation Caused by Social Distancing: Case Study. *JMIR Public Health Surveill*. 2020;6(2):e19297.

Zhang MX, Yan HF, Wu JY, Zheng YJ. Quarantine Vehicle Scheduling for Transferring High-Risk Individuals in Epidemic Areas. *Int J Environ Res Public Health*. 2020;17(7).

Kakimoto K, Kamiya H, Yamagishi T, Matsui T, Suzuki M, Wakita T. Initial Investigation of Transmission of COVID-19 Among Crew Members During Quarantine of a Cruise Ship - Yokohama, Japan, February 2020. *MMWR Morb Mortal Wkly Rep*. 2020;69(11):312-3.

Yamahata Y, Shibata A. Preparation for Quarantine on the Cruise Ship Diamond Princess in Japan due to COVID-19. *JMIR Public Health Surveill*. 2020;6(2):e18821.



Razai MS, Oakeshott P, Kankam H, Galea S, Stokes-Lampard H. Mitigating the psychological effects of social isolation during the COVID-19 pandemic. *BMJ*. 2020;369:m1904.

Pecanha T, Goessler KF, Roschel H, Gualano B. Social isolation during the COVID-19 pandemic can increase physical inactivity and the global burden of cardiovascular disease. *Am J Physiol Heart Circ Physiol*. 2020;318(6):H1441-H6.

Brooks SK, Webster RK, Smith LE, et al. The psychological impact of quarantine and how to reduce it: rapid review of the evidence. *Lancet*. 2020;395(10227):912-20.

Lei L, Huang X, Zhang S, Yang J, Yang L, Xu M. Comparison of Prevalence and Associated Factors of Anxiety and Depression Among People Affected by versus People Unaffected by Quarantine During the COVID-19 Epidemic in Southwestern China. *Med Sci Monit*. 2020;26:e924609.

Han E, Chiou S-T, McKee M, Legido-Quigley H. The resilience of Taiwan's health system to address the COVID-19 pandemic. (In press).

Tang B, Xia F, Tang S, Bragazzi NL, Li Q, Sun X, Liang J, Xiao Y, Wu J. The effectiveness of quarantine and isolation determine the trend of the COVID-19 epidemics in the final phase of the current outbreak in China. *Int J Infect Dis*. 2020 Jun;95:288-293.

#### **For the second review between June 2020 and January 2021**

McCombs A, Kadelka C. A model-based evaluation of the efficacy of COVID-19 social distancing, testing and hospital triage policies. *PLoS Comput Biol*. 2020

Wang S, Ding S, Xiong L. A New System for Surveillance and Digital Contact Tracing for COVID-19: Spatiotemporal Reporting Over Network and GPS. *JMIR Mhealth Uhealth*. 2020

Altmann S, Milsom L, Zillessen H, Blasone R, Gerdon F, Bach R, Kreuter F, Nosenzo D, Toussaert S, Abeler J. Acceptability of App-Based Contact Tracing for COVID-19: Cross-Country Survey Study. *JMIR Mhealth Uhealth*. 2020

Kowalski J, Marchlewska M, Molenda Z, GÅ³rska P, GawÄ™da Å. Adherence to safety and self-isolation guidelines, conspiracy and paranoia-like beliefs during COVID-19 pandemic in Poland - associations and moderators. *Psychiatry Res*. 2020

Walrave M, Waeterloos C, Ponnet K. Adoption of a Contact Tracing App for Containing COVID-19: A Health Belief Model Approach. *JMIR Public Health Surveill*. 2020

Vicentini C, Bazzolo S, Gamba D, Zotti CM. Analysis of the Fatality Rate in Relation to Testing Capacity during the First 50 days of the COVID-19 Epidemic in Italy. *Am J Trop Med Hyg*. 2020

Park Y, Huh IS, Lee J, Kang CR, Cho SI, Ham HJ, Kim HS, Kim JI, Na BJ, Lee JY; Seoul Metropolitan Government COVID-19 Rapid Response (SCoRR) Team. Application of Testing-Tracing-Treatment Strategy in Response to the COVID-19 Outbreak in Seoul, Korea. *J Korean Med Sci*. 2020

Nijsingh N, van Bergen A, Wild V. Applying a Precautionary Approach to Mobile Contact Tracing for COVID-19: The Value of Reversibility. *J Bioeth Inq*. 2020

Edjoc R, Atchessi N, Lien A, Smith BA, Gabrani-Juma I, Abalos C, Heisz M. Assessing the progression of the COVID-19 pandemic in Canada using testing data and time-dependent reproduction numbers. *Can J Public Health*. 2020

Bradshaw WJ, Alley EC, Huggins JH, Lloyd AL, Esvelt KM. Bidirectional contact tracing could dramatically improve COVID-19 control. *Nat Commun*. 2021

Magno L, Rossi TA, Mendonça-Lima FW, Santos CCD, Campos GB, Marques LM, Pereira M, Prado NMBL, Dourado I. Challenges and proposals for scaling up COVID-19 testing and diagnosis in Brazil. *Cien Saude Colet*. 2020

Rahaman KR, Mahmud MS, Mallick B. Challenges of Testing COVID-19 Cases in Bangladesh. *Int J Environ Res Public Health*. 2020

Falaschi Z, Danna PSC, Arioli R, Paschella A, Zagaria D, Percivale I, Tricca S, Barini M, Aquilini F, Andreoni S, Carriero A. Chest CT accuracy in diagnosing COVID-19 during the peak of the Italian epidemic: A retrospective correlation with RT-PCR testing and analysis of discordant cases. *Eur J Radiol*. 2020

Brendish NJ, Poole S, Naidu VV, Mansbridge CT, Norton NJ, Wheeler H, Presland L, Kidd S, Cortes NJ, Borca F, Phan H, Babbage G, Visseaux B, Ewings S, Clark TW. Clinical impact of molecular point-of-care testing for suspected COVID-19 in hospital (COV-19POC): a prospective, interventional, non-randomised, controlled study. *Lancet Respir Med*. 2020

DB S, Undi M, Annadani R, Siddique A. Comparison of Measures adopted to combat COVID 19 Pandemic by different countries in WHO regions. *Indian J Community Health [Internet]*. 2020 Apr. 20 [cited 2021 Feb. 5]; 32(2 (Supp)):288 -299.

Grassly NC, Pons-Salort M, Parker EPK, White PJ, Ferguson NM; Imperial College COVID-19 Response Team. Comparison of molecular testing strategies for COVID-19 control: a mathematical modelling study. *Lancet Infect Dis*. 2020

Cheng HY, Jian SW, Liu DP, Ng TC, Huang WT, Lin HH; Taiwan COVID-19 Outbreak Investigation Team. Contact Tracing Assessment of COVID-19 Transmission Dynamics in Taiwan and Risk at Different Exposure Periods Before and After Symptom Onset. *JAMA Intern Med*. 2020

Jian SW, Cheng HY, Huang XT, Liu DP. Contact tracing with digital assistance in Taiwan's COVID-19 outbreak response. *Int J Infect Dis*. 2020

Wei C, Lee CC, Hsu TC, Hsu WT, Chan CC, Chen SC, Chen CJ. Correlation of population mortality of COVID-19 and testing coverage: a comparison among 36 OECD countries. *Epidemiol Infect*. 2020

Eilersen A, Sneppen K. Cost-benefit of limited isolation and testing in COVID-19 mitigation. *Sci Rep*. 2020

Ruebush E, Fraser MR, Poulin A, Allen M, Lane JT, Blumenstock JS. COVID-19 Case Investigation and Contact Tracing: Early Lessons Learned and Future Opportunities. *J Public Health Manag Pract*. 2021

Jonker M, de Bekker-Grob E, Veldwijk J, Goossens L, Bour S, Rutten-Van Melick M. COVID-19 Contact Tracing Apps: Predicted Uptake in the Netherlands Based on a Discrete Choice Experiment. *JMIR Mhealth Uhealth*. 2020

Chanda A. COVID-19 in India: transmission dynamics, epidemiological characteristics, testing, recovery and effect of weather. *Epidemiol Infect*. 2020

Salameh P. COVID-19 in the Eastern Mediterranean Region: testing frequency, cumulative cases and mortality analysis. *East Mediterr Health J*. 2020

Brooks ZC, Das S. COVID-19 Testing. *Am J Clin Pathol*. 2020

Mettler SK, Kim J, Maathuis MH. Diagnostic serial interval as a novel indicator for contact tracing effectiveness exemplified with the SARS-CoV-2/COVID-19 outbreak in South Korea. *Int J Infect Dis*. 2020

Malheiro R, Figueiredo AL, Magalhães JP, Teixeira P, Moita I, Moutinho MC, Mansilha RB, Gonçalves LM, Ferreira E. Effectiveness of contact tracing and quarantine on reducing COVID-19 transmission: a retrospective cohort study. *Public Health*. 2020

Keeling MJ, Hollingsworth TD, Read JM. Efficacy of contact tracing for the containment of the 2019 novel coronavirus (COVID-19). *J Epidemiol Community Health*. 2020

de Wolff T, Pflüger D, Rehme M, Heuer J, Bittner MI. Evaluation of pool-based testing approaches to enable population-wide screening for COVID-19. *PLoS One*. 2020

Frowde R, Dove ES, Laurie GT. Fail to Prepare and you Prepare to Fail: the Human Rights Consequences of the UK Government's Inaction during the COVID-19 Pandemic. *Asian Bioeth Rev*. 2020

Reiss S, Franchina V, Jutzi C, Willardt R, Jonas E. From anxiety to action-Experience of threat, emotional states, reactance, and action preferences in the early days of COVID-19 self-isolation in Germany and Austria. *PLoS One*. 2020

Kretzschmar ME, Rozhnova G, Bootsma MCJ, van Boven M, van de Wijgert JHHM, Bonten MJM. Impact of delays on effectiveness of contact tracing strategies for COVID-19: a modelling study. *Lancet Public Health*. 2020

Smalley DL, Cisarik PM, Grantham J, Cloud W, Neil RB, DePriest P. Impact of Pool Testing in Detection of Asymptomatic Patients with COVID-19. *Lab Med*. 2021

Bodas M, Peleg K. Income assurances are a crucial factor in determining public compliance with self-isolation regulations during the COVID-19 outbreak - cohort study in Israel. *Isr J Health Policy Res*. 2020

Li S, Feng B, Liao W, Pan W. Internet Use, Risk Awareness, and Demographic Characteristics Associated With Engagement in Preventive Behaviors and Testing: Cross-Sectional Survey on COVID-19 in the United States. *J Med Internet Res*. 2020

Gray N, Calleja D, Wimbush A, Miralles-Dolz E, Gray A, De Angelis M, Derrer-Merk E, Oparaji BU, Stepanov V, Clearkin L, Ferson S. Is "no test is better than a bad test"? Impact of diagnostic uncertainty in mass testing on the spread of COVID-19. *PLoS One*. 2020

Smyrliki I, Ekman M, Lentini A, Rufino de Sousa N, Papanicolaou N, Vondracek M, Aarum J, Safari H, Muradrasoli S, Rothfuchs AG, Albert J, Hållberg B, Reinius B. Massive and rapid COVID-19 testing is feasible by extraction-free SARS-CoV-2 RT-PCR. *Nat Commun*. 2020

Bilinski A, Mostashari F, Salomon JA. Modeling Contact Tracing Strategies for COVID-19 in the Context of Relaxed Physical Distancing Measures. *JAMA Netw Open*. 2020

Aleta A, Martín-Corral D, Pastore Y Piontti A, Ajelli M, Litvinova M, Chinazzi M, Dean NE, Halloran ME, Longini IM Jr, Merler S, Pentland A, Vespignani A, Moro E, Moreno Y. Modelling the impact of testing, contact tracing and household quarantine on second waves of COVID-19. *Nat Hum Behav*. 2020

Kaspar K. Motivations for Social Distancing and App Use as Complementary Measures to Combat the COVID-19 Pandemic: Quantitative Survey Study. *J Med Internet Res*. 2020

Wells CR, Townsend JP, Pandey A, Moghadas SM, Krieger G, Singer B, McDonald RH, Fitzpatrick MC, Galvani AP. Optimal COVID-19 quarantine and testing strategies. *Nat Commun*. 2021

Huang Z, Guo H, Lee YM, Ho EC, Ang H, Chow A. Performance of Digital Contact Tracing Tools for COVID-19 Response in Singapore: Cross-Sectional Study. *JMIR Mhealth Uhealth*. 2020

Yap KY, Xie Q. Personalizing symptom monitoring and contact tracing efforts through a COVID-19 web-app. *Infect Dis Poverty*. 2020

Ezeibe CC, Ilo C, Ezeibe EN, Oguonu CN, Nwankwo NA, Ajaero CK, Osadebe N. Political distrust and the spread of COVID-19 in Nigeria. *Glob Public Health*. 2020

Gopaul R, Davis J, Gangai L, Goetz L. Practical Diagnostic Accuracy of Nasopharyngeal Swab Testing for Novel Coronavirus Disease 2019 (COVID-19). *West J Emerg Med*. 2020

Ferrari D, Sabetta E, Ceriotti D, Motta A, Strollo M, Banfi G, Locatelli M. Routine blood analysis greatly reduces the false-negative rate of RT-PCR testing for Covid-19. *Acta Biomed*. 2020

Bodas M, Peleg K. Self-Isolation Compliance In The COVID-19 Era Influenced By Compensation: Findings From A Recent Survey In Israel. *Health Aff (Millwood)*. 2020

Deckert A, Bärnighausen T, Kyei NN. Simulation of pooled-sample analysis strategies for COVID-19 mass testing. *Bull World Health Organ*. 2020

Li Y, Yao L, Li J, Chen L, Song Y, Cai Z, Yang C. Stability issues of RT-PCR testing of SARS-CoV-2 for hospitalized patients clinically diagnosed with COVID-19. *J Med Virol*. 2020

Chiu WA, Fischer R, Ndeffo-Mbah ML. State-level needs for social distancing and contact tracing to contain COVID-19 in the United States. *Nat Hum Behav*. 2020

Indenbaum V, Koren R, Katz-Likvornik S, Yitzchaki M, Halpern O, Regev-Yochay G, Cohen C, Biber A, Feferman T, Cohen Saban N, Dhan R, Levin T, Gozlan Y, Weil M, Mor O, Mandelboim M, Sofer D, Mendelson E, Lustig Y. Testing IgG antibodies against the RBD of SARS-CoV-2 is sufficient and necessary for COVID-19 diagnosis. *PLoS One*. 2020

Müller M, Derlet PM, Mudry C, Aeppli G. Testing of asymptomatic individuals for fast feedback-control of COVID-19 pandemic. *Phys Biol*. 2020

Xie K, Liang B, Dulebenets MA, Mei Y. The Impact of Risk Perception on Social Distancing during the COVID-19 Pandemic in China. *Int J Environ Res Public Health*. 2020

Jung J, Jang H, Kim HK, Kim J, Kim A, Ko KP. The Importance of Mandatory COVID-19 Diagnostic Testing Prior to Release from Quarantine. *J Korean Med Sci*. 2020

Hong K, Yum S, Kim J, Chun BC. The Serial Interval of COVID-19 in Korea: 1,567 Pairs of Symptomatic Cases from Contact Tracing. *J Korean Med Sci*. 2020

Gul S, Tuncay K, Binici B, Aydin BB. Transmission dynamics of Covid-19 in Italy, Germany and Turkey considering social distancing, testing and quarantine. *J Infect Dev Ctries*. 2020

Sawano T, Kotera Y, Ozaki A, Murayama A, Tanimoto T, Sah R, Wang J. Underestimation of COVID-19 cases in Japan: an analysis of RT-PCR testing for COVID-19 among 47 prefectures in Japan. *QJM*. 2020

- Jacofsky D, Jacofsky EM, Jacofsky M. Understanding Antibody Testing for COVID-19. *J Arthroplasty*. 2020
- Miklos Szocska, Peter Pollner, Istvan Schiszler et al. Countrywide population movement monitoring using mobile devices generated (big) data during the COVID-19 crisis. *Scientific Reports*. 2021
- Alger, J; Cafferata, ML; Alvarado, T; Ciganda, A; Corrales, A; Desale, H; Drouin, A; Fusco, D; Garcia, J; Gibbons, L; Harville, E; Lopez, W; Lorenzana, I; Munoz-Lara, F; Palou, E; Retes, E; Sierra, M; Stella, C; Xiong, X; Zambrano, LI; Buekens, P. Using Prenatal Blood Samples to Evaluate COVID-19 Rapid Serologic Tests Specificity. *Maternal and child health journal*. 2020
- Schrager, JD; Schuler, K; Isakov, AP; Wright, DW; Yaffee, AQ; Jacobson, KL; Parker, RM; Goolsby, C. Development and Usability Testing of a Web-based COVID-19 Self-triage Platform. *Western journal of emergency medicine*. 2020
- Bai AD, Li XX, Alsalem M, Khan S, Smieja M, Mertz D, Chagla Z. Utility of asymptomatic inpatient testing for COVID-19 in a low-prevalence setting: A multicenter point-prevalence study. *Infect Control Hosp Epidemiol*. 2020
- Flynn EF, Kuhn E, Shaik M, Tarr E, Scattolini N, Ballantine A. Drive-Through COVID-19 Testing During the 2020 Pandemic: A Safe, Efficient, and Scalable Model for Pediatric Patients and Health Care Workers. *Acad Pediatr*. 2020
- Brendish NJ, Poole S, Naidu VV, Mansbridge CT, Norton NJ, Wheeler H, Presland L, Kidd S, Cortes NJ, Borca F, Phan H, Babbage G, Visseaux B, Ewings S, Clark TW. Clinical impact of molecular point-of-care testing for suspected COVID-19 in hospital (COV-19POC): a prospective, interventional, non-randomised, controlled study. *Lancet Respir Med*. 2020
- Dinnes J, Deeks JJ, Berhane S, et al. Rapid, point-of-care antigen and molecular-based tests for diagnosis of SARS-CoV-2 infection. *Cochrane Database Syst Rev* 2021
- Abera A, Belay H, Zewude A, Gidey B, Nega D, Dufera B, Abebe A, Endriyas T, Getachew B, Birhanu H, Difabachew H, Mekonnen B, Legesse H, Bekele F, Mekete K, Seifu S, Sime H, Yemanabrhan N, Tefera M, Amare H, Beyene B, Tsige E, Kebede A, Tasew G, Tollera G, Abate E, Woyessa A, Assefa A. Establishment of COVID-19 testing laboratory in resource-limited settings: challenges and prospects reported from Ethiopia. *Glob Health Action*. 2020
- Wu DC, Jha P, Lam T, Brown P, Gelband H, Nagelkerke N, Birnboim HC, Reid A; Action to Beat Coronavirus in Canada/Action pour Battre le Coronavirus (Ab-C) Study Group. Predictors of self-reported symptoms and testing for COVID-19 in Canada using a nationally representative survey. *PLoS One*. 2020
- Younes N, Al-Sadeq DW, Al-Jighefee H, Younes S, Al-Jamal O, Daas HI, Yassine HM, Nasrallah GK. Challenges in Laboratory Diagnosis of the Novel Coronavirus SARS-CoV-2. *Viruses*. 2020
